# Supplementary material for: Oleic Acid Status Positively Correlates with the Soluble Receptor for Advanced Glycation End-Products (sRAGE) in Healthy Adults Who Are Homozygous for G Allele of RAGE G82S Polymorphism
Source: MDPI journal article supplement (doi:10.3390/cells12121662), 2023-06-19
Supplement: s1 [file s1]

**Supplementary Table S1. Red blood cell fatty acid composition in the study cohort**

| <b>RBCs Fatty acid</b>                      | <b>Mean <math>\pm</math> S.E* (interquartile range)</b> |
|---------------------------------------------|---------------------------------------------------------|
| <b>Saturated fatty acids</b>                |                                                         |
| Myristic acid (C14:0)                       | 0.31 $\pm$ 0.00 (0.14 – 0.57)                           |
| Pentadecylic acid (C15:0)                   | 0.40 $\pm$ 0.01 (0.13 – 0.75)                           |
| Palmitic acid (C16:0)                       | 21.18 $\pm$ 0.20 (17.60 – 30.69)                        |
| Stearic acid (C18:0)                        | 17.67 $\pm$ 0.14 (15.32 – 25.47)                        |
| Arachidic acid (C20:0)                      | 0.67 $\pm$ 0.01 (0.47 – 1.08)                           |
| Behenic acid (C22:0)                        | 2.44 $\pm$ 0.02 (1.71 – 3.69)                           |
| Tricosylic acid (C23:0)                     | 0.37 $\pm$ 0.01 (0.24 – 0.68)                           |
| Lignoceric acid (C24:0)                     | 8.53 $\pm$ 0.07 (6.52 – 11.90)                          |
| Total SFA                                   | 51.57 $\pm$ 0.46                                        |
| <b>Monounsaturated fatty acids</b>          |                                                         |
| Palmitoleic acid (C16:1n-9)                 | 0.29 $\pm$ 0.01 (0.13 – 1.54)                           |
| Oleic acid (C18:1n-9)                       | 14.49 $\pm$ 0.08 (12.03 – 17.90)                        |
| Nervonic acid (C24:1n-9)                    | 6.43 $\pm$ 0.06 (4.60 – 8.74)                           |
| Total MUFA                                  | 21.21 $\pm$ 0.15                                        |
| <b>Polyunsaturated fatty acids</b>          |                                                         |
| Linoleic acid (C18:2n-6)                    | 7.15 $\pm$ 0.10 (2.40 – 9.58)                           |
| $\gamma$ -Linolenic acid (C18:3n-6)         | 0.08 $\pm$ 0.00 (0.00 – 0.12)                           |
| $\alpha$ -Linolenic acid (C18:3n-3)         | 0.08 $\pm$ 0.00 (0.00 – 0.22)                           |
| Dihomo- $\gamma$ -linolenic acid (C20:3n-6) | 1.25 $\pm$ 0.03 (0.12 – 2.02)                           |
| Arachidonic acid (C20:4n-6)                 | 10.82 $\pm$ 0.23 (1.21 – 15.53)                         |
| Eicosapentanoic acid (C20:5n-3)             | 0.93 $\pm$ 0.06 (0.04 – 4.57)                           |
| Docosadienoic acid (C22:2n-9)               | 0.18 $\pm$ 0.01 (0.10 -0.49)                            |
| Docosapentaenoic acid (C22:5n-3)            | 2.08 $\pm$ 0.06 (0.19 – 3.97)                           |
| Docosahexaenoic acid (C22:6n-3)             | 4.64 $\pm$ 0.13 (0.66 – 8.50)                           |
| Total PUFA                                  | 27.21 $\pm$ 0.62                                        |

\* expressed as % of total RBC fatty acids.
